# Supplementary material
Source: MDPI journal article supplement (https://www.mdpi.com/2071-1050/13/13/7262)
Supplement: s1 [file s1]

# Supplementary material

Table S1. Emission factors

|                  | Sector        | Final energy factor | Carbon emission factor                                                         | Source |
|------------------|---------------|---------------------|--------------------------------------------------------------------------------|--------|
| Stationary       | District heat | -                   | 0.26 t CO <sub>2</sub> -eq/MWh                                                 | [1]    |
|                  | Gas           | -                   | 0.25 t CO <sub>2</sub> -eq/MWh                                                 | [1]    |
|                  | Electricity   | -                   | 0.55 t CO <sub>2</sub> -eq/MWh                                                 | [1]    |
| Public transport | S-Bahn        | 20.27 Wh/km         | 0.60 g CO <sub>2</sub> /Wh                                                     | [2]    |
|                  | U6            | 20.27 Wh/km         | 0.60 g CO <sub>2</sub> /Wh                                                     | [2]    |
|                  | U9            | 20.27 Wh/km         | 0.60 g CO <sub>2</sub> /Wh                                                     | [2]    |
|                  | M13           | 20.27 Wh/km         | 0.60 g CO <sub>2</sub> /Wh                                                     | [2]    |
|                  | 50            | 20.27 Wh/km         | 0.60 g CO <sub>2</sub> /Wh                                                     | [2]    |
| Road traffic     | Cars          | 0,78 kWh/veh-km     | 312 g CO <sub>2</sub> -eq/kWh (diesel)<br>304 CO <sub>2</sub> -eq/kWh (petrol) | [3]    |
|                  | Trucks        | 2,73 kWh/veh-km     | 312 CO <sub>2</sub> -eq/kWh                                                    | [3]    |
|                  | Vans <= 3.5 t | 0,82 kWh/veh-km     | 312 CO <sub>2</sub> -eq/kWh                                                    | [3]    |
|                  | Buses         | 4,44 kWh/veh-km     | 312 CO <sub>2</sub> -eq/kWh                                                    | [3]    |
|                  | Coaches       | 4,11 kWh/veh-km     | 312 CO <sub>2</sub> -eq/kWh                                                    | [3]    |
|                  | Motor cycles  | 0,33 kWh/veh-km     | 312 CO <sub>2</sub> -eq/kWh                                                    | [3]    |

Table S2. Household size and corresponding occurrence

| Household size       | Occurrence of the household size [%] |
|----------------------|--------------------------------------|
| 1-person household   | 36.26 %                              |
| 2-person household   | 26.85 %                              |
| 3-person household   | 11.47 %                              |
| ≥ 4-person household | 25.42 %                              |

Table S3. Base price / Purchaser Price ratios

| CES category                   | Base price / Purchaser price |
|--------------------------------|------------------------------|
| Food                           | 0.73                         |
| Alcohol and tobacco            | 0.2                          |
| Men's clothing                 | 0.51                         |
| Women's clothing               | 0.51                         |
| Clothing for children under 14 | 0.51                         |

|                                                                      |      |
|----------------------------------------------------------------------|------|
| Other clothing and accessories                                       | 0.51 |
| Shoes and shoe accessories                                           | 0.51 |
| Repairs, cleaning, lending                                           | 0.56 |
| Apartment rents, etc.                                                | 0.8  |
| Energy                                                               | 0.41 |
| House maintenance                                                    | 0.61 |
| Furniture and furnishings                                            | 0.46 |
| Carpets and other floor covering                                     | 0.46 |
| Refrigerators and freezers                                           | 0.56 |
| Other major household appliances                                     | 0.56 |
| Small electrical household appliances                                | 0.56 |
| Home textiles                                                        | 0.46 |
| Other consumer goods for household management                        | 0.61 |
| Consumer goods for household management                              | 0.61 |
| Services for household management                                    | 0.61 |
| Commodity for health care                                            | 0.61 |
| Consumer goods for health care                                       | 0.61 |
| Services for health care                                             | 0.61 |
| Motor vehicles                                                       | 0.61 |
| Motor vehicles and bicycles                                          | 0.61 |
| Spare parts and accessories for motor vehicles and motorcycles       | 0.61 |
| Fuels and lubricants                                                 | 0.31 |
| Maintenance, repairs of motor vehicles, motorcycles and bicycles     | 0.61 |
| Other services                                                       | 0.61 |
| Passenger transportation, transport services                         | 0.61 |
| Telephone, fax machines, answering machines                          | 0.56 |
| Postal and telecommunication services                                | 0.61 |
| Radio receivers and the like                                         | 0.56 |
| Television and video equipment, TV antennas                          | 0.56 |
| Photographic, cinematographic and optical equipment                  | 0.56 |
| Data processing equipment and software (incl. downloads)             | 0.61 |
| Image, data and sound carriers (incl. downloads)                     | 0.61 |
| Other durable goods and equipment for culture, sports, camping, etc. | 0.51 |
| Toys and hobbies                                                     | 0.51 |
| Flowers and gardens                                                  | 0.61 |
| Pets                                                                 | 0.61 |
| Recreational and cultural services                                   | 0.61 |
| Books                                                                | 0.51 |
| Newspapers, magazines, etc.                                          | 0.61 |
| Other consumer goods                                                 | 0.61 |
| Repairs for leisure, entertainment and culture                       | 0.61 |
| Package tours                                                        | 0.61 |
| Tutoring                                                             | 0.61 |
| Fees, child care                                                     | 0.61 |
| Catering services                                                    | 0.61 |
| Accommodation services                                               | 0.73 |

---

|                                      |      |
|--------------------------------------|------|
| Jewellery, watches                   | 0.41 |
| Other personal effects               | 0.61 |
| Personal care services               | 0.61 |
| Personal care articles and equipment | 0.51 |
| Other services                       | 0.61 |

Table S4. Streets in Wedding

| Name of the street     | Length of the section [km] | Daily average traffic volume [number of vehicles] |
|------------------------|----------------------------|---------------------------------------------------|
| Londoner Str.          | 0.648                      | 13592                                             |
| Am Nordhafen           | 0.244                      | 2862                                              |
| Reginhardstr.          | 0.09                       | 5940                                              |
| Transvaalstr.          | 1.281                      | 59400                                             |
| Dohnagestell           | 0.501                      | 21240                                             |
| Barfusstr.             | 0.944                      | 63900                                             |
| Müllerstr.             | 3.693                      | 580320                                            |
| Chausseestr.           | 0.444                      | 51570                                             |
| Amrumer Str.           | 1.172                      | 138960                                            |
| Afrikanische Str.      | 1.826                      | 197550                                            |
| Sylter Str.            | 0.363                      | 18505                                             |
| Nordufer               | 0.354                      | 18505                                             |
| Reinickendorfer Str.   | 1.803                      | 314730                                            |
| Luxemburger Str.       | 0.812                      | 95040                                             |
| Sellerstr.             | 0.445                      | 24120                                             |
| Louise-Schroeder-Platz | 0.119                      | 21600                                             |
| Fennstr.               | 0.766                      | 146430                                            |
| Föhrer Str.            | 0.455                      | 125280                                            |
| Seestr.                | 3.16                       | 774810                                            |
| Total                  | 19.12                      | 2674354                                           |

Table S5. Summary of territorial energy consumption and resulting carbon emissions

|                  |               | Energy consumption [MWh / a] | CO2 [t CO2-eq / a] | Share of carbon emissions |
|------------------|---------------|------------------------------|--------------------|---------------------------|
| Public transport | District heat | 299 395.95                   | 78 741.13          | 19.64%                    |
|                  | Gas           | 492 802.90                   | 121 722.32         | 30.36%                    |
|                  | Electricity   | 276 511.39                   | 153 187.31         | 38.21%                    |
|                  | Urban Railway | 1 663.13                     | 997.88             | 0.25%                     |
|                  | Metro 6       | 6 062.19                     | 3 637.32           | 0.91%                     |

|              |                       |           |            |       |
|--------------|-----------------------|-----------|------------|-------|
| Road traffic | Metro 9               | 2 777.34  | 1 666.41   | 0.42% |
|              | Tram M13              | 291.23    | 174.74     | 0.04% |
|              | Tram 50               | 159.22    | 95.53      | 0.02% |
|              | Cars                  | 98 722.69 | 30 327.61  | 7.56% |
|              | Trucks > 3.5 t        | 12 525.54 | 3 907.97   | 0.97% |
|              | Delivery vans ≤ 3.5 t | 12 602.97 | 3 932.13   | 0.98% |
|              | Buses                 | 5 276.11  | 1 646.15   | 0.41% |
|              | Coaches               | 1 733.38  | 540.82     | 0.13% |
|              | Motorcycles           | 1 215.92  | 369.64     | 0.09% |
|              | Total                 |           | 400 946.95 |       |

Table S6. Consumption-based results by sectors

| Sector                                                                   | CO <sub>2</sub> | CH <sub>4</sub> | N <sub>2</sub> O | GHG [kg CO <sub>2</sub> -eq] |
|--------------------------------------------------------------------------|-----------------|-----------------|------------------|------------------------------|
| Real estate services (70)                                                | 3.16E+07        | 1.89E+06        | 4.88E+05         | 3.40E+07                     |
| Animal products nec                                                      | 3.57E+06        | 1.47E+07        | 4.83E+06         | 2.31E+07                     |
| Steam and hot water supply services                                      | 2.21E+07        | 2.78E+05        | 2.12E+05         | 2.26E+07                     |
| Electricity by coal                                                      | 1.82E+07        | 4.33E+05        | 2.48E+05         | 1.89E+07                     |
| Crops nec                                                                | 3.66E+06        | 1.10E+07        | 3.39E+06         | 1.81E+07                     |
| Chemicals nec                                                            | 1.03E+07        | 2.27E+06        | 3.70E+05         | 1.30E+07                     |
| Leather and leather products (19)                                        | 4.07E+06        | 7.68E+06        | 9.70E+05         | 1.27E+07                     |
| Hotel and restaurant services (55)                                       | 8.88E+06        | 2.33E+06        | 1.03E+06         | 1.22E+07                     |
| Ceramic goods                                                            | 8.53E+06        | 9.50E+05        | 1.16E+05         | 9.59E+06                     |
| Products of meat cattle                                                  | 9.92E+05        | 6.07E+06        | 2.09E+06         | 9.15E+06                     |
| Wheat                                                                    | 2.40E+06        | 2.42E+05        | 5.75E+06         | 8.39E+06                     |
| Other Bituminous Coal                                                    | 4.15E+06        | 3.80E+06        | 4.28E+04         | 8.00E+06                     |
| Rubber and plastic products (25)                                         | 6.83E+06        | 5.85E+05        | 9.26E+04         | 7.51E+06                     |
| Cereal grains nec                                                        | 2.10E+06        | 2.89E+05        | 5.03E+06         | 7.42E+06                     |
| Dairy products                                                           | 2.70E+06        | 3.59E+06        | 9.46E+05         | 7.24E+06                     |
| Processed rice                                                           | 2.27E+06        | 4.14E+06        | 5.25E+05         | 6.93E+06                     |
| Meat animals nec                                                         | 6.83E+05        | 4.12E+06        | 1.35E+06         | 6.15E+06                     |
| Textiles (17)                                                            | 4.72E+06        | 1.10E+06        | 2.05E+05         | 6.03E+06                     |
| Other transport equipment (35)                                           | 5.10E+06        | 6.00E+05        | 7.74E+04         | 5.78E+06                     |
| Wearing apparel; furs (18)                                               | 4.27E+06        | 1.10E+06        | 2.51E+05         | 5.62E+06                     |
| Motor vehicles, trailers and semi-trailers (34)                          | 5.01E+06        | 5.21E+05        | 7.79E+04         | 5.61E+06                     |
| Beverages                                                                | 3.74E+06        | 1.01E+06        | 7.51E+05         | 5.49E+06                     |
| Patent Fuel                                                              | 4.09E+06        | 1.17E+06        | 5.40E+04         | 5.32E+06                     |
| BKB/Peat Briquettes                                                      | 4.03E+06        | 1.13E+06        | 5.32E+04         | 5.22E+06                     |
| Vegetables, fruit, nuts                                                  | 3.50E+06        | 4.01E+05        | 9.79E+05         | 4.89E+06                     |
| Furniture; other manufactured goods n.e.c. (36)                          | 4.01E+06        | 5.81E+05        | 7.15E+04         | 4.66E+06                     |
| Supporting and auxiliary transport services; travel agency services (63) | 4.01E+06        | 2.95E+05        | 5.21E+04         | 4.36E+06                     |
| Machinery and equipment n.e.c. (29)                                      | 3.71E+06        | 4.47E+05        | 5.47E+04         | 4.22E+06                     |
| Raw milk                                                                 | 4.15E+05        | 3.03E+06        | 7.53E+05         | 4.20E+06                     |

|                                                                                   |          |          |          |          |
|-----------------------------------------------------------------------------------|----------|----------|----------|----------|
| Electricity by gas                                                                | 3.61E+06 | 8.81E+04 | 7.72E+03 | 3.71E+06 |
| Sea and coastal water transportation services                                     | 3.53E+06 | 6.30E+04 | 2.04E+04 | 3.62E+06 |
| Electricity by petroleum and other oil derivatives                                | 3.44E+06 | 1.10E+05 | 1.10E+04 | 3.56E+06 |
| Recreational, cultural and sporting services (92)                                 | 3.17E+06 | 2.94E+05 | 8.13E+04 | 3.54E+06 |
| Food products nec                                                                 | 1.79E+06 | 1.15E+06 | 6.03E+05 | 3.54E+06 |
| Paper and paper products                                                          | 2.63E+06 | 3.17E+05 | 8.91E+04 | 3.04E+06 |
| Plastic waste for treatment: incineration                                         | 2.77E+06 | 1.32E+05 | 3.51E+04 | 2.93E+06 |
| Anthracite                                                                        | 1.83E+06 | 1.06E+06 | 2.34E+04 | 2.92E+06 |
| Office machinery and computers (30)                                               | 2.52E+06 | 3.16E+05 | 4.63E+04 | 2.88E+06 |
| Fabricated metal products, except machinery and equipment (28)                    | 2.51E+06 | 2.65E+05 | 3.47E+04 | 2.81E+06 |
| Wood waste for treatment: landfill                                                | 1.70E+06 | 9.40E+05 | 3.86E+04 | 2.68E+06 |
| Intert/metal waste for treatment: incineration                                    | 2.53E+06 | 8.20E+04 | 2.93E+04 | 2.64E+06 |
| Electricity by biomass and waste                                                  | 2.48E+06 | 8.07E+04 | 8.07E+04 | 2.64E+06 |
| Railway transportation services                                                   | 2.38E+06 | 2.10E+05 | 3.56E+04 | 2.62E+06 |
| Health and social work services (85)                                              | 2.06E+06 | 3.69E+05 | 1.30E+05 | 2.56E+06 |
| Textiles waste for treatment: incineration                                        | 2.28E+06 | 8.65E+04 | 2.53E+04 | 2.39E+06 |
| Sugar                                                                             | 1.38E+06 | 4.48E+05 | 5.39E+05 | 2.37E+06 |
| Electrical machinery and apparatus n.e.c. (31)                                    | 2.02E+06 | 2.23E+05 | 3.26E+04 | 2.27E+06 |
| Other land transportation services                                                | 1.88E+06 | 2.86E+05 | 3.59E+04 | 2.20E+06 |
| Cement, lime and plaster                                                          | 2.09E+06 | 3.76E+04 | 7.02E+03 | 2.13E+06 |
| N-fertiliser                                                                      | 2.03E+06 | 6.73E+04 | 1.23E+04 | 2.11E+06 |
| Products of forestry, logging and related services (02)                           | 1.32E+06 | 4.97E+05 | 1.38E+05 | 1.96E+06 |
| Poultry                                                                           | 8.79E+05 | 1.93E+05 | 8.72E+05 | 1.94E+06 |
| Membership organisation services n.e.c. (91)                                      | 1.63E+06 | 1.91E+05 | 5.24E+04 | 1.87E+06 |
| Electricity by Geothermal                                                         | 1.57E+06 | 2.28E+05 | 3.89E+04 | 1.84E+06 |
| Crude petroleum and services related to crude oil extraction, excluding surveying | 1.09E+06 | 7.29E+05 | 2.64E+04 | 1.84E+06 |
| Products of meat pigs                                                             | 1.11E+06 | 3.80E+05 | 3.02E+05 | 1.79E+06 |
| Radio, television and communication equipment and apparatus (32)                  | 1.50E+06 | 1.98E+05 | 2.68E+04 | 1.72E+06 |
| Printed matter and recorded media (22)                                            | 1.51E+06 | 1.24E+05 | 2.66E+04 | 1.66E+06 |
| Food waste for treatment: incineration                                            | 1.56E+06 | 7.87E+04 | 2.11E+04 | 1.66E+06 |
| Kerosene                                                                          | 9.38E+05 | 6.58E+05 | 1.86E+04 | 1.61E+06 |
| Gas/Diesel Oil                                                                    | 1.12E+06 | 4.78E+05 | 8.63E+03 | 1.61E+06 |
| Kerosene Type Jet Fuel                                                            | 1.12E+06 | 4.72E+05 | 7.80E+03 | 1.60E+06 |
| Paper waste for treatment: incineration                                           | 1.49E+06 | 8.04E+04 | 2.05E+04 | 1.59E+06 |
| Motor Gasoline                                                                    | 1.11E+06 | 4.72E+05 | 8.05E+03 | 1.59E+06 |
| Post and telecommunication services (64)                                          | 1.46E+06 | 1.05E+05 | 2.38E+04 | 1.59E+06 |
| Liquefied Petroleum Gases (LPG)                                                   | 1.06E+06 | 4.68E+05 | 8.21E+03 | 1.54E+06 |

|                                                                                                                       |          |          |          |          |
|-----------------------------------------------------------------------------------------------------------------------|----------|----------|----------|----------|
| Wood and products of wood and cork (except furniture); articles of straw and plaiting materials (20)                  | 1.22E+06 | 1.74E+05 | 3.36E+04 | 1.43E+06 |
| Meat products nec                                                                                                     | 6.80E+05 | 4.35E+05 | 2.29E+05 | 1.34E+06 |
| Other services (93)                                                                                                   | 1.19E+06 | 1.05E+05 | 2.00E+04 | 1.31E+06 |
| Fish products                                                                                                         | 6.60E+05 | 4.15E+05 | 1.94E+05 | 1.27E+06 |
| Air transport services (62)                                                                                           | 1.16E+06 | 4.65E+04 | 1.67E+04 | 1.23E+06 |
| Other non-metallic mineral products                                                                                   | 1.09E+06 | 9.67E+04 | 1.08E+04 | 1.20E+06 |
| Fish and other fishing products; services incidental of fishing (05)                                                  | 1.06E+06 | 9.67E+04 | 2.51E+04 | 1.19E+06 |
| Sale, maintenance, repair of motor vehicles, motor vehicles parts, motorcycles, motor cycles parts and accessoires    | 1.15E+06 | 1.01E+04 | 8.29E+03 | 1.17E+06 |
| Transmission services of electricity                                                                                  | 1.06E+06 | 3.64E+04 | 1.36E+04 | 1.11E+06 |
| Distribution and trade services of electricity                                                                        | 1.06E+06 | 3.68E+04 | 1.36E+04 | 1.11E+06 |
| Inland water transportation services                                                                                  | 9.06E+05 | 4.51E+04 | 1.05E+04 | 9.61E+05 |
| Gas Works Gas                                                                                                         | 8.77E+05 | 4.62E+04 | 4.80E+03 | 9.28E+05 |
| Products of meat poultry                                                                                              | 5.19E+05 | 2.42E+05 | 1.54E+05 | 9.15E+05 |
| Distribution services of gaseous fuels through mains                                                                  | 8.36E+05 | 4.54E+04 | 5.36E+03 | 8.86E+05 |
| Biogasoline                                                                                                           | 7.62E+05 | 5.75E+04 | 1.43E+04 | 8.34E+05 |
| Construction work (45)                                                                                                | 7.80E+05 | 3.80E+04 | 8.72E+03 | 8.27E+05 |
| Bricks, tiles and construction products, in baked clay                                                                | 7.66E+05 | 2.99E+04 | 6.04E+03 | 8.02E+05 |
| Education services (80)                                                                                               | 7.14E+05 | 6.08E+04 | 1.55E+04 | 7.91E+05 |
| Other Liquid Biofuels                                                                                                 | 6.48E+05 | 5.30E+04 | 1.25E+04 | 7.13E+05 |
| products of Vegetable oils and fats                                                                                   | 3.77E+05 | 1.52E+05 | 1.82E+05 | 7.11E+05 |
| Biodiesels                                                                                                            | 6.42E+05 | 4.88E+04 | 1.24E+04 | 7.03E+05 |
| Oil seeds                                                                                                             | 2.07E+05 | 3.49E+04 | 4.51E+05 | 6.93E+05 |
| Medical, precision and optical instruments, watches and clocks (33)                                                   | 6.27E+05 | 4.60E+04 | 8.83E+03 | 6.82E+05 |
| Tobacco products (16)                                                                                                 | 3.95E+05 | 1.92E+05 | 4.80E+04 | 6.34E+05 |
| Other waste for treatment: waste water treatment                                                                      | 4.81E+05 | 1.85E+04 | 5.41E+03 | 5.05E+05 |
| Retail trade services of motor fuel                                                                                   | 4.73E+05 | 6.80E+03 | 3.24E+03 | 4.83E+05 |
| P- and other fertiliser                                                                                               | 4.06E+05 | 4.91E+04 | 7.63E+03 | 4.63E+05 |
| Peat                                                                                                                  | 4.02E+05 | 4.01E+04 | 5.66E+03 | 4.48E+05 |
| Retail trade services, except of motor vehicles and motorcycles; repair services of personal and household goods (52) | 4.20E+05 | 3.69E+03 | 3.38E+03 | 4.28E+05 |
| Chemical and fertilizer minerals, salt and other mining and quarrying products n.e.c.                                 | 3.03E+05 | 3.43E+04 | 7.39E+03 | 3.45E+05 |
| Electricity nec                                                                                                       | 1.91E+05 | 1.62E+04 | 2.28E+03 | 2.09E+05 |
| Research and development services (73)                                                                                | 1.82E+05 | 1.82E+04 | 3.61E+03 | 2.04E+05 |
| Wood waste for treatment: incineration                                                                                | 1.91E+05 | 9.37E+03 | 2.55E+03 | 2.03E+05 |
| Electricity by hydro                                                                                                  | 1.71E+05 | 2.00E+04 | 2.55E+03 | 1.94E+05 |
| Wholesale trade and commission trade services, except of motor vehicles and motorcycles (51)                          | 1.66E+05 | 3.92E+03 | 1.78E+03 | 1.72E+05 |

|                                                                                                             |          |          |          |          |
|-------------------------------------------------------------------------------------------------------------|----------|----------|----------|----------|
| Electricity by nuclear                                                                                      | 1.42E+05 | 1.47E+04 | 1.80E+03 | 1.58E+05 |
| Electricity by wind                                                                                         | 1.39E+05 | 1.37E+04 | 1.78E+03 | 1.54E+05 |
| Other business services (74)                                                                                | 1.43E+05 | 7.66E+03 | 2.45E+03 | 1.53E+05 |
| Computer and related services (72)                                                                          | 1.40E+05 | 8.16E+03 | 2.01E+03 | 1.50E+05 |
| Services auxiliary to financial<br>intermediation (67)                                                      | 1.10E+05 | 1.46E+04 | 4.02E+03 | 1.29E+05 |
| Public administration and defence services;<br>compulsory social security services (75)                     | 1.10E+05 | 1.21E+04 | 4.36E+03 | 1.27E+05 |
| Electricity by solar photovoltaic                                                                           | 1.14E+05 | 1.00E+04 | 1.55E+03 | 1.26E+05 |
| Insurance and pension funding services,<br>except compulsory social security services<br>(66)               | 1.10E+05 | 7.83E+03 | 2.17E+03 | 1.20E+05 |
| Renting services of machinery and<br>equipment without operator and of<br>personal and household goods (71) | 9.97E+04 | 5.39E+03 | 2.67E+03 | 1.08E+05 |
| Financial intermediation services, except<br>insurance and pension funding services<br>(65)                 | 1.00E+05 | 5.55E+03 | 1.62E+03 | 1.08E+05 |
| Private households with employed persons<br>(95)                                                            | 6.16E+03 | 3.41E+02 | 1.96E+01 | 6.52E+03 |

Table S7. Consumption-based results by country

| Country        | CO2      | CH4      | N2O      | GHG [kg<br>CO2-eq] |
|----------------|----------|----------|----------|--------------------|
| Austria        | 1.05E+06 | 9.62E+05 | 2.99E+05 | 2.31E+06           |
| Australia      | 3.08E+05 | 1.79E+05 | 5.60E+04 | 5.44E+05           |
| Belgium        | 1.82E+06 | 4.21E+05 | 2.24E+05 | 2.47E+06           |
| Bulgaria       | 4.37E+05 | 3.19E+05 | 9.73E+04 | 8.53E+05           |
| Brazil         | 7.18E+05 | 2.20E+06 | 9.90E+05 | 3.90E+06           |
| Canada         | 3.96E+05 | 8.44E+04 | 6.47E+04 | 5.45E+05           |
| Switzerland    | 9.42E+05 | 2.07E+05 | 4.26E+04 | 1.19E+06           |
| China          | 1.71E+07 | 3.79E+06 | 8.89E+05 | 2.18E+07           |
| Cyprus         | 1.23E+04 | 2.77E+03 | 6.84E+02 | 1.58E+04           |
| Czech Republic | 2.30E+06 | 5.58E+05 | 3.87E+05 | 3.24E+06           |
| Germany        | 1.93E+08 | 3.32E+07 | 1.97E+07 | 2.46E+08           |
| Denmark        | 6.77E+05 | 1.54E+05 | 1.93E+05 | 1.02E+06           |
| Estonia        | 1.24E+05 | 3.19E+04 | 2.84E+04 | 1.85E+05           |
| Spain          | 1.33E+06 | 5.47E+05 | 2.92E+05 | 2.17E+06           |
| Finland        | 3.48E+05 | 5.35E+04 | 4.06E+04 | 4.42E+05           |
| France         | 3.26E+06 | 8.58E+05 | 8.26E+05 | 4.94E+06           |
| United Kingdom | 1.86E+06 | 1.11E+06 | 4.09E+05 | 3.38E+06           |
| Greece         | 4.78E+05 | 1.34E+05 | 5.53E+04 | 6.67E+05           |
| Croatia        | 1.43E+05 | 2.50E+04 | 3.15E+03 | 1.71E+05           |
| Hungary        | 8.88E+05 | 2.32E+05 | 1.90E+05 | 1.31E+06           |
| Indonesia      | 7.33E+05 | 3.08E+05 | 1.29E+05 | 1.17E+06           |
| Ireland        | 4.14E+05 | 3.10E+05 | 1.17E+05 | 8.41E+05           |
| India          | 3.69E+06 | 7.90E+06 | 8.58E+05 | 1.25E+07           |

|                      |          |          |          |          |
|----------------------|----------|----------|----------|----------|
| Italy                | 2.71E+06 | 8.03E+05 | 2.17E+05 | 3.73E+06 |
| Japan                | 7.66E+05 | 6.48E+04 | 8.18E+03 | 8.39E+05 |
| South Korea          | 7.45E+05 | 1.30E+05 | 1.33E+04 | 8.88E+05 |
| Lithuania            | 1.07E+05 | 5.21E+04 | 2.16E+05 | 3.75E+05 |
| Luxembourg           | 1.48E+05 | 5.56E+04 | 1.58E+04 | 2.20E+05 |
| Latvia               | 8.58E+04 | 5.76E+04 | 3.98E+04 | 1.83E+05 |
| Malta                | 3.03E+04 | 6.46E+03 | 4.56E+02 | 3.72E+04 |
| Mexico               | 4.84E+05 | 1.28E+06 | 4.79E+05 | 2.25E+06 |
| Netherlands          | 3.25E+06 | 1.09E+06 | 4.97E+05 | 4.83E+06 |
| Norway               | 3.62E+05 | 2.25E+05 | 2.02E+04 | 6.07E+05 |
| Poland               | 3.34E+06 | 2.59E+06 | 5.55E+05 | 6.48E+06 |
| Portugal             | 4.61E+05 | 3.17E+05 | 1.01E+05 | 8.78E+05 |
| Romania              | 7.56E+05 | 4.61E+05 | 2.04E+05 | 1.42E+06 |
| Russia               | 2.69E+06 | 1.00E+06 | 3.62E+04 | 3.73E+06 |
| Sweden               | 3.70E+05 | 1.05E+05 | 7.71E+04 | 5.52E+05 |
| Slovenia             | 2.50E+05 | 5.06E+04 | 6.06E+03 | 3.06E+05 |
| Slovakia             | 7.70E+05 | 2.32E+05 | 5.81E+04 | 1.06E+06 |
| Turkey               | 9.16E+05 | 2.09E+05 | 6.32E+04 | 1.19E+06 |
| Taiwan               | 1.11E+06 | 3.64E+05 | 3.71E+04 | 1.51E+06 |
| United States        | 4.31E+06 | 8.48E+05 | 3.05E+05 | 5.46E+06 |
| RoW Asia and Pacific | 7.79E+06 | 1.20E+07 | 1.42E+06 | 2.12E+07 |
| RoW Europe           | 1.11E+06 | 4.40E+05 | 3.31E+05 | 1.88E+06 |
| RoW Africa           | 1.82E+06 | 3.72E+06 | 1.07E+06 | 6.61E+06 |
| RoW America          | 1.85E+06 | 9.46E+06 | 3.85E+06 | 1.52E+07 |
| RoW Middle East      | 5.76E+06 | 9.20E+05 | 4.45E+05 | 7.12E+06 |
| South Africa         | 9.75E+05 | 5.32E+05 | 3.83E+04 | 1.55E+06 |

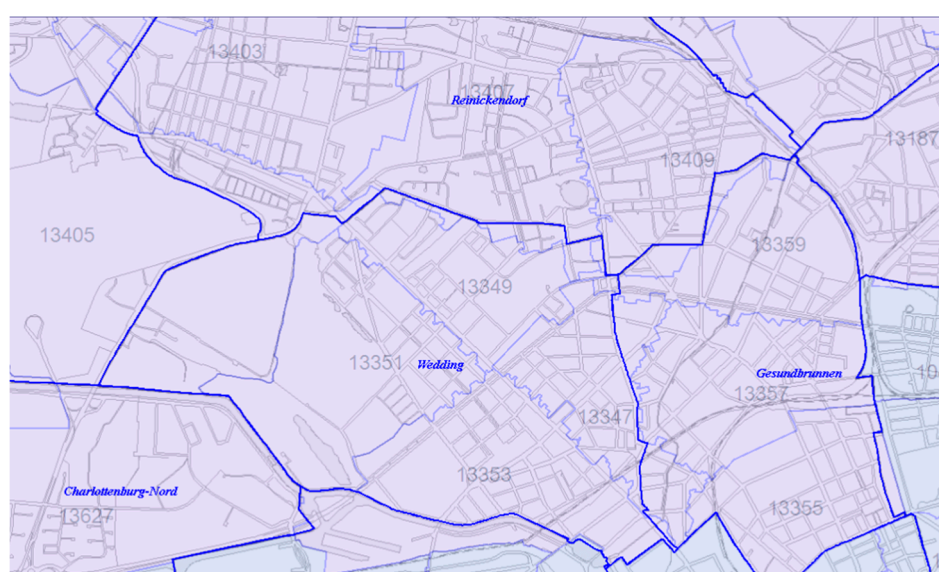

Figure S1. Map of Wedding [4]



## Reference list

1. Hertle, H.; Dünnebeil, F.; Gugel, B.; Rechsteiner, E.; Reinhard, C. *Empfehlungen Zur Methodik Der Kommunalen Treibhausgasbilanzierung Für Den Energie- Und Verkehrssektor in Deutschland Kurzfassung (Aktualisierung 11/2019)*; ifeu: Heidelberg, 2019.
2. Allekotte, M.; Biemann, K.; Heidt, C.; Colson, M.; Knörr, W. Aktualisierung der Modelle TREMOD/TREMOD-MM für die Emissionsberichterstattung 2020 (Berichtsperiode 1990–2018). **2020**, 205.
3. *Klimaschutz in Kommunen: Praxisleitfaden*; Dieckmann, P., Deutsches Institut für Urbanistik, Institut für Energie- und Umweltforschung, Klima-Bündnis Europäischer Städte mit den Indigenen Völkern der Regenwälder zum Erhalt der Erdatmosphäre, Eds.; Service & Kompetenzzentrum Kommunaler Klimaschutz, SK:KK; 3., aktualisierte und erweiterte Auflage.; Deutsches Institut für Urbanistik gGmbH: Berlin, 2018; ISBN 978-3-88118-585-1.
4. Senatsverwaltung für Stadtentwicklung und Wohnen FIS-Broker. Available online: <https://fbinter.stadt-berlin.de/fb/index.jsp> (accessed on 22 June 2021).
